# Supplementary material for: Alkyl passivation and SiO2 encapsulation of silicon nanoparticles: preparation, surface modification and luminescence properties
Source: Royal Society of Chemistry journal article supplement (doi:10.1039/c3tc30571f), 2013-01-01
Supplement: c3tc30571f.pdf [file c3tc30571f.pdf]

## Alkyl Passivation and SiO<sub>2</sub> Encapsulation of Silicon Nanoparticles: Preparation, Surface Modification and Luminescence Properties

Guo-Hui Pan,<sup>a\*</sup> Alexandre Barras,<sup>a</sup> Luc Boussekey,<sup>b</sup> Ahmed Addad,<sup>c</sup> Rabah Boukherroub<sup>a\*</sup>

<sup>a</sup> *Institut de Recherche Interdisciplinaire, USR CNRS 3078, Université Lille 1, Parc de la Haute Borne, 50 avenue de Halley, 59658 Villeneuve d'Ascq, France*

<sup>b</sup> *Laboratoire de Spectrochimie Infrarouge et Raman, CNRSUMR 8516, Université Lille 1, 59655 Villeneuve d'Ascq, France*

<sup>c</sup> *Unité Matériaux et Transformations, UMR CNRS 8207, Université Lille 1, 59655 Villeneuve d'Ascq, France*

**Key words:** *Silicon nanoparticles, silica coating, surface modification, photoluminescence, water dispersion*

\*To whom correspondence should be addressed: [guohui.pan@aliyun.com](mailto:guohui.pan@aliyun.com);  
[rabah.boukherroub@iri.univ-lille1.fr](mailto:rabah.boukherroub@iri.univ-lille1.fr); Tel: +33 3 62 53 17 24; Fax: +33 3 62 53 17 01

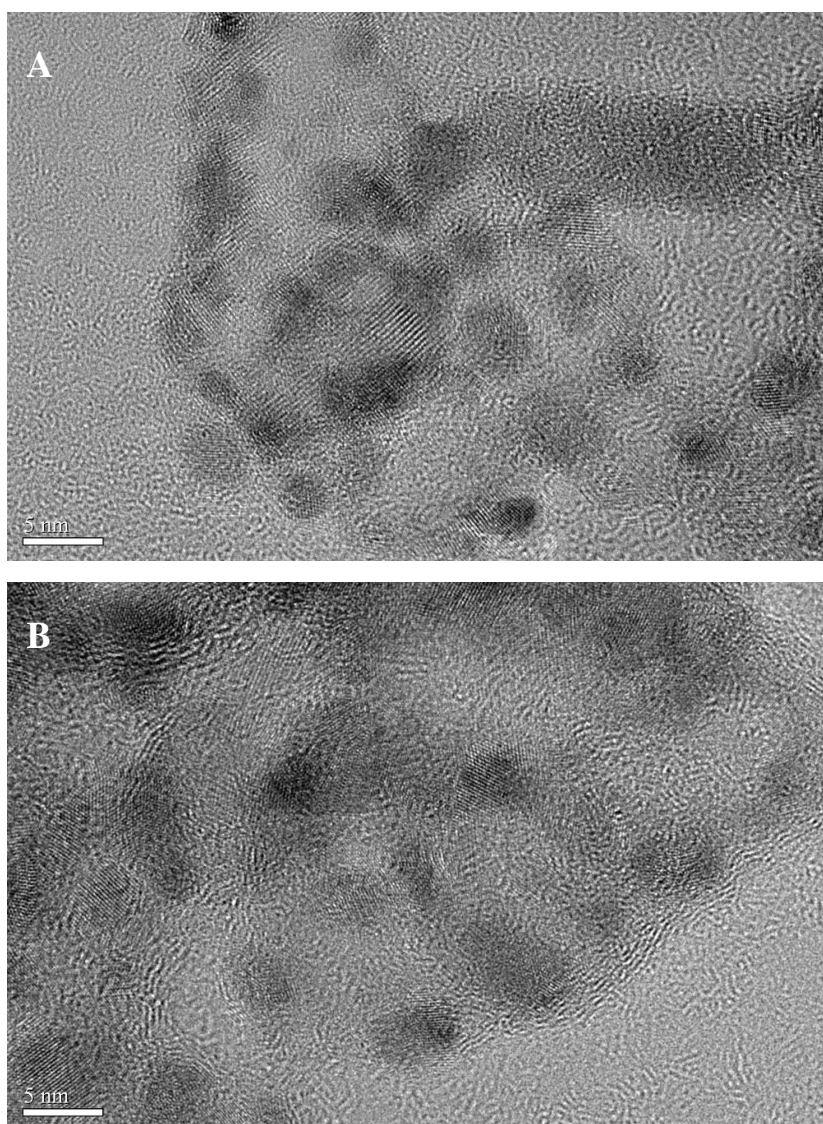

**Figure S1** (A, B) High resolution TEM images of crystalline decyl-modified SiNPs.

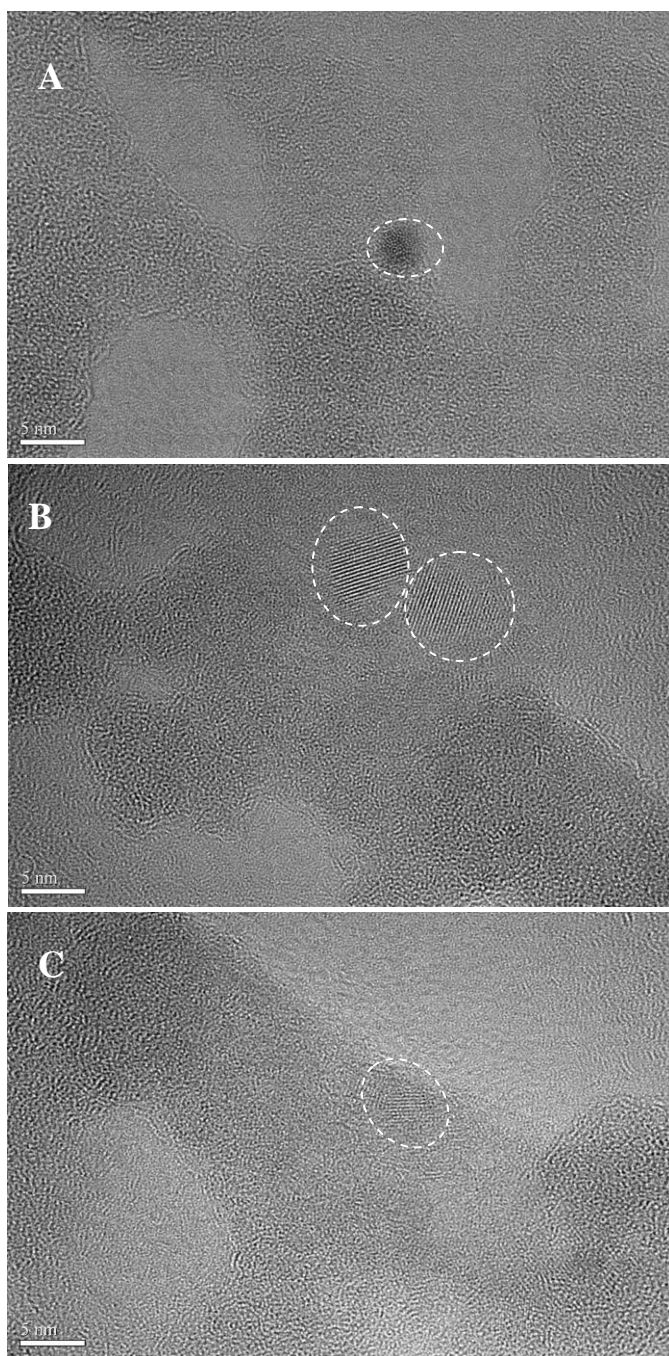

**Figure S2** (A, B, C) High resolution TEM images of  $\sim 15$  nm SiNPs@SiO<sub>2</sub> NPs.

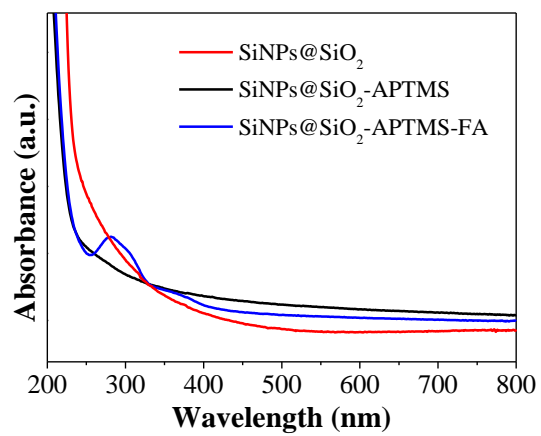

**Figure S3.** UV-vis absorption spectra of SiNPs@SiO<sub>2</sub>, SiNPs@SiO<sub>2</sub>-APTMS and SiNPs@SiO<sub>2</sub>-APTMS-FA nanoparticles dispersed in water.
